# Supplementary material for: Early Postnatal Cardiac Stress Does Not Influence Ventricular Cardiomyocyte Cell-Cycle Withdrawal
Source: MDPI journal article supplement (doi:10.3390/jcdd8040038), 2021-04-07

Supplemental Figure 1

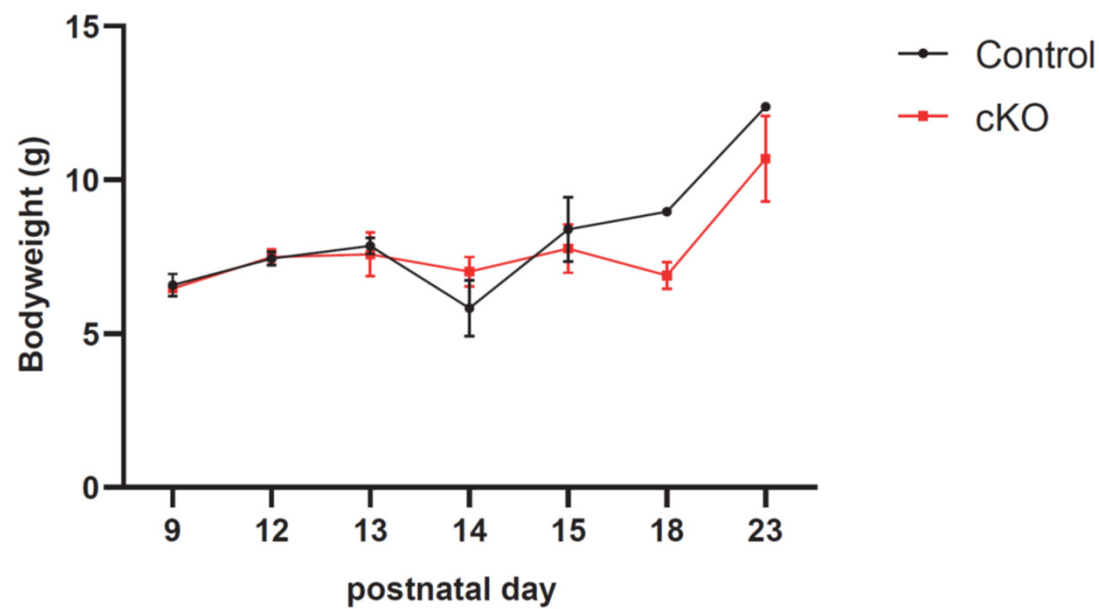

## Supplemental Figure 2

Supplemental Figure 2

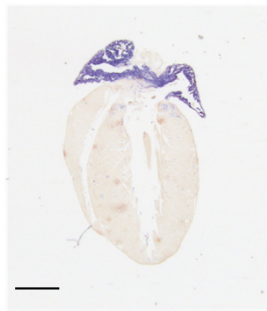

Control  
HW/BW=6.2 mg/g  
male  
Nppa=0

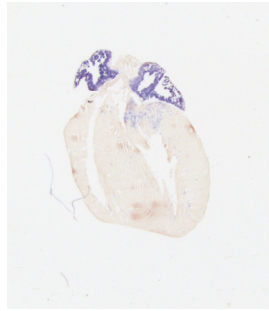

Control  
HW/BW=6.9 mg/g  
female  
Nppa=0

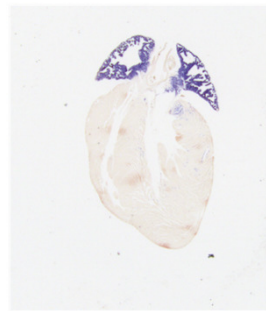

Control  
HW/BW=6.6 mg/g  
male  
Nppa=0

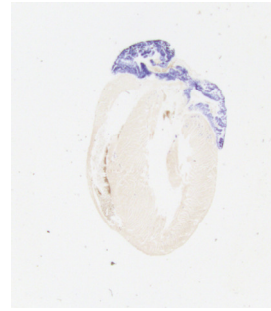

Control  
HW/BW=6.2 mg/g  
female  
Nppa=0

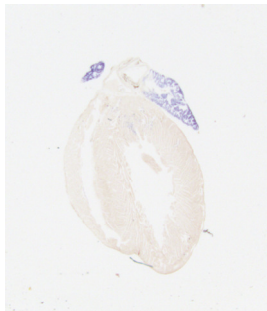

Control  
HW/BW=6.1 mg/g  
male  
Nppa=0

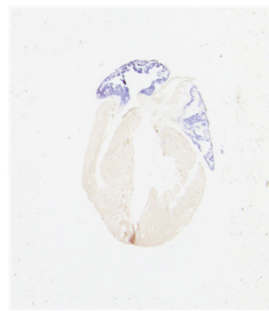

Control  
HW/BW=6.0 mg/g  
female  
Nppa=0

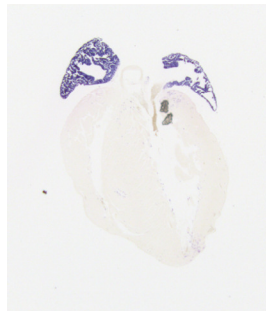

Control  
HW/BW=6.1 mg/g  
female  
Nppa=0

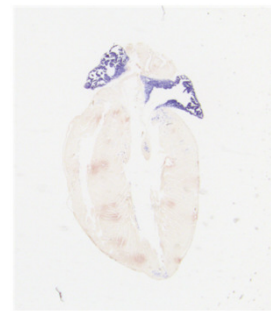

Control  
HW/BW=6.3 mg/g  
female  
Nppa=0

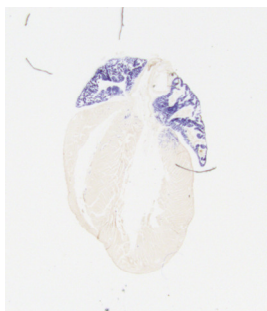

cKO  
HW/BW=5.7 mg/g  
female  
Nppa=0

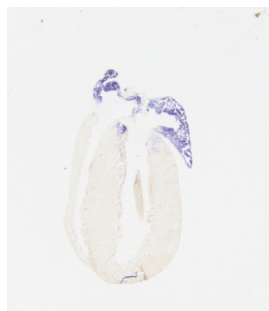

cKO  
HW/BW=5.8 mg/g  
female  
Nppa=0

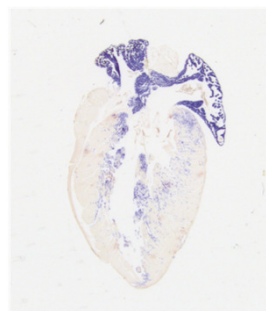

cKO  
HW/BW=8.1 mg/g  
female  
Nppa=1

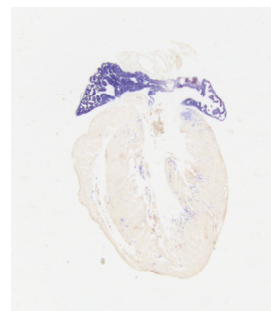

cKO  
HW/BW=8.4 mg/g  
male  
Nppa=1

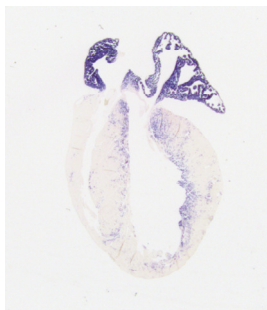

cKO  
HW/BW=8.7 mg/g  
female  
Nppa=1

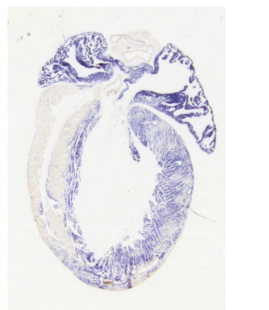

cKO  
HW/BW=12.7 mg/g  
male  
Nppa=1

## Supplemental Figure 3

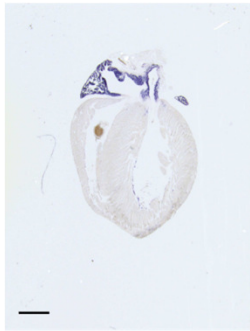

Control  
HW/BW=7.3 mg/g  
female  
Nppa=0

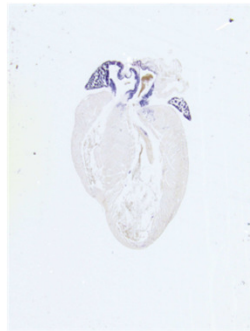

Control  
HW/BW=6.8 mg/g  
male  
Nppa=0

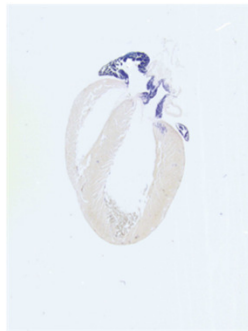

Control  
HW/BW=6.1 mg/g  
female  
Nppa=0

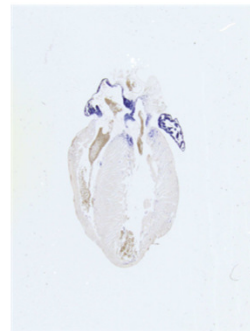

cKO  
HW/BW=9.0 mg/g  
female  
Nppa=0

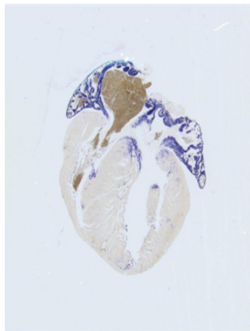

cKO  
HW/BW=10.0 mg/g  
female  
Nppa=0

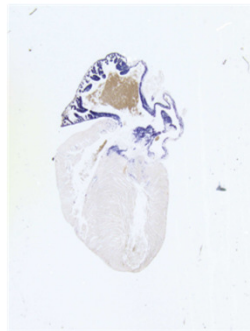

cKO  
HW/BW=9.9 mg/g  
female  
Nppa=0

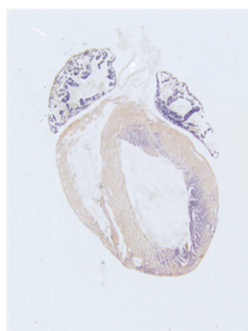

cKO  
HW/BW=10.6 mg/g  
female  
Nppa=1

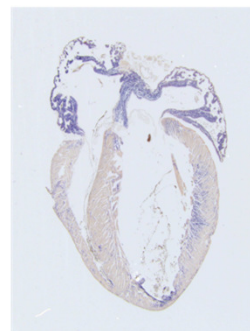

cKO  
HW/BW=20.9 mg/g  
male  
Nppa=1

# Supplemental Figure 4

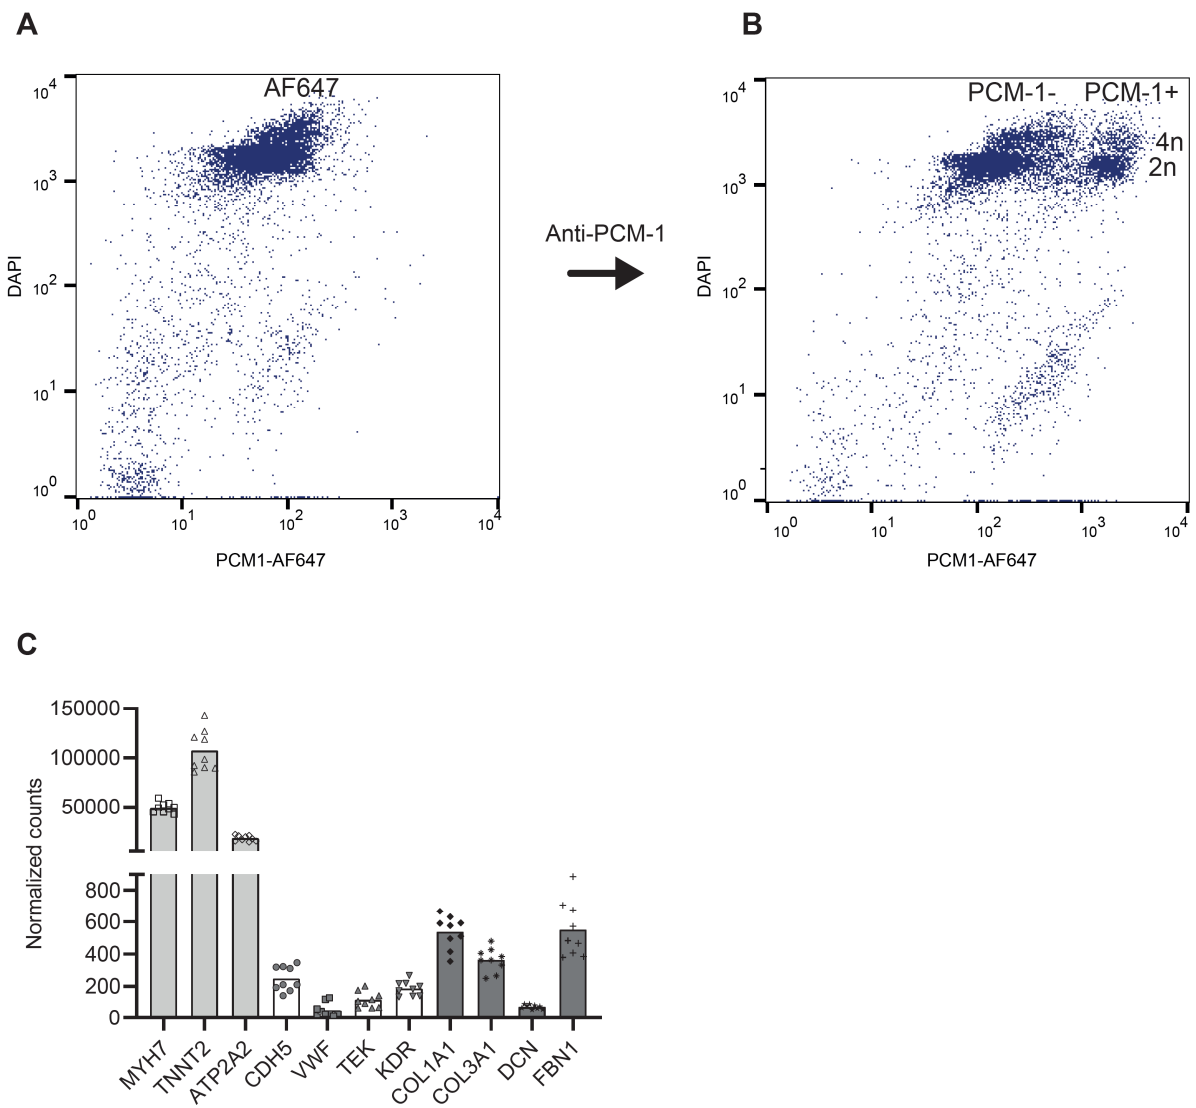

Supplemental Figure 5

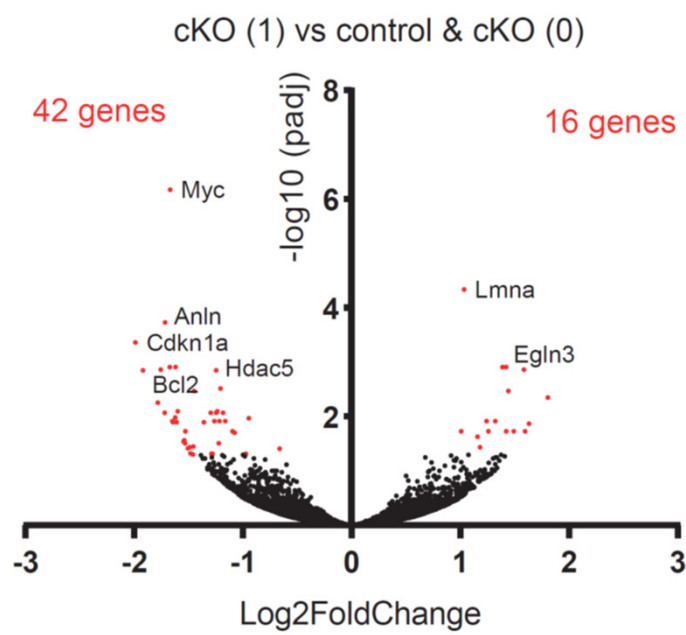

Supplement: s1 [file s1]
